# Supplementary material for: Negative feedback between TAp63 and Mir-133b mediates colorectal cancer suppression
Source: PubMed Central journal article supplement (PMC5349978; doi:10.18632/oncotarget.13515), 2016-11-23
Supplement: oncotarget-07-87147-s001.pdf [file oncotarget-07-87147-s001.pdf]

## Negative feedback between TAp63 and Mir-133b mediates colorectal cancer suppression

### SUPPLEMENTARY FIGURES AND TABLE

A

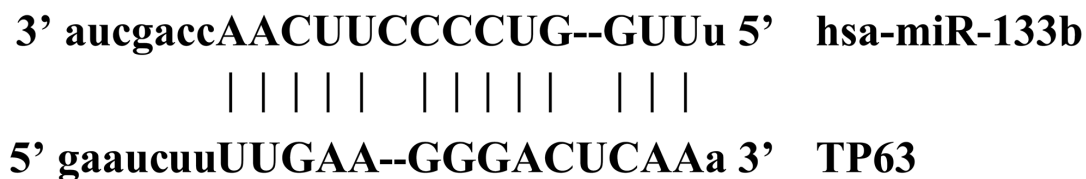

B

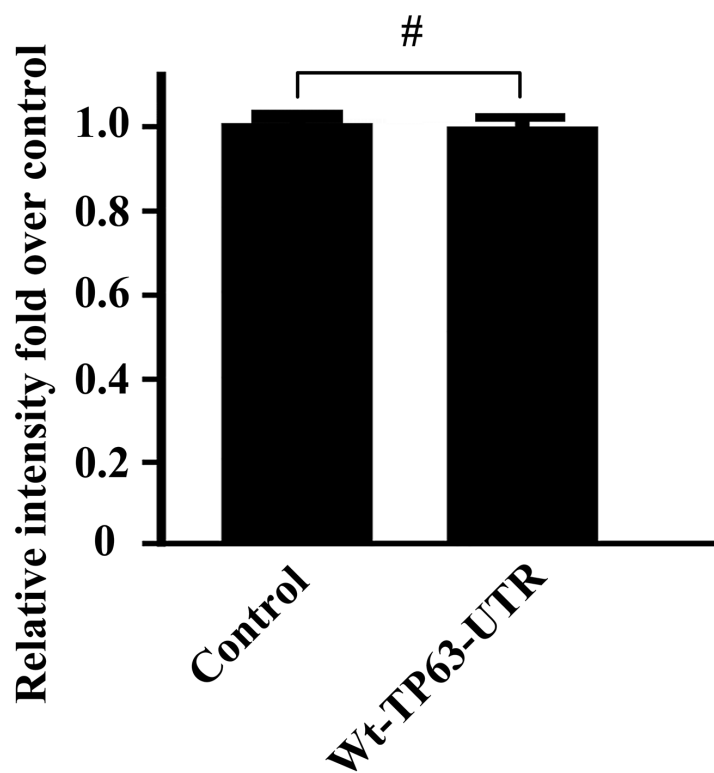

**Supplementary Figure S1: Luciferase assay.** A. position of the miR-133b target site along 3'-UTR of p63 B. HCT-116 cells were cotransfected with miR-133b vectors together with a firefly luciferase vector containing p63 3'-UTR and a Renilla luciferase control; the histogram indicates the relative luciferase unit (RLU) in different transfected cells; data represent the means  $\pm$  SD of three different experiments analyzed in triplicate.  $^{\#}P > 0.05$ .

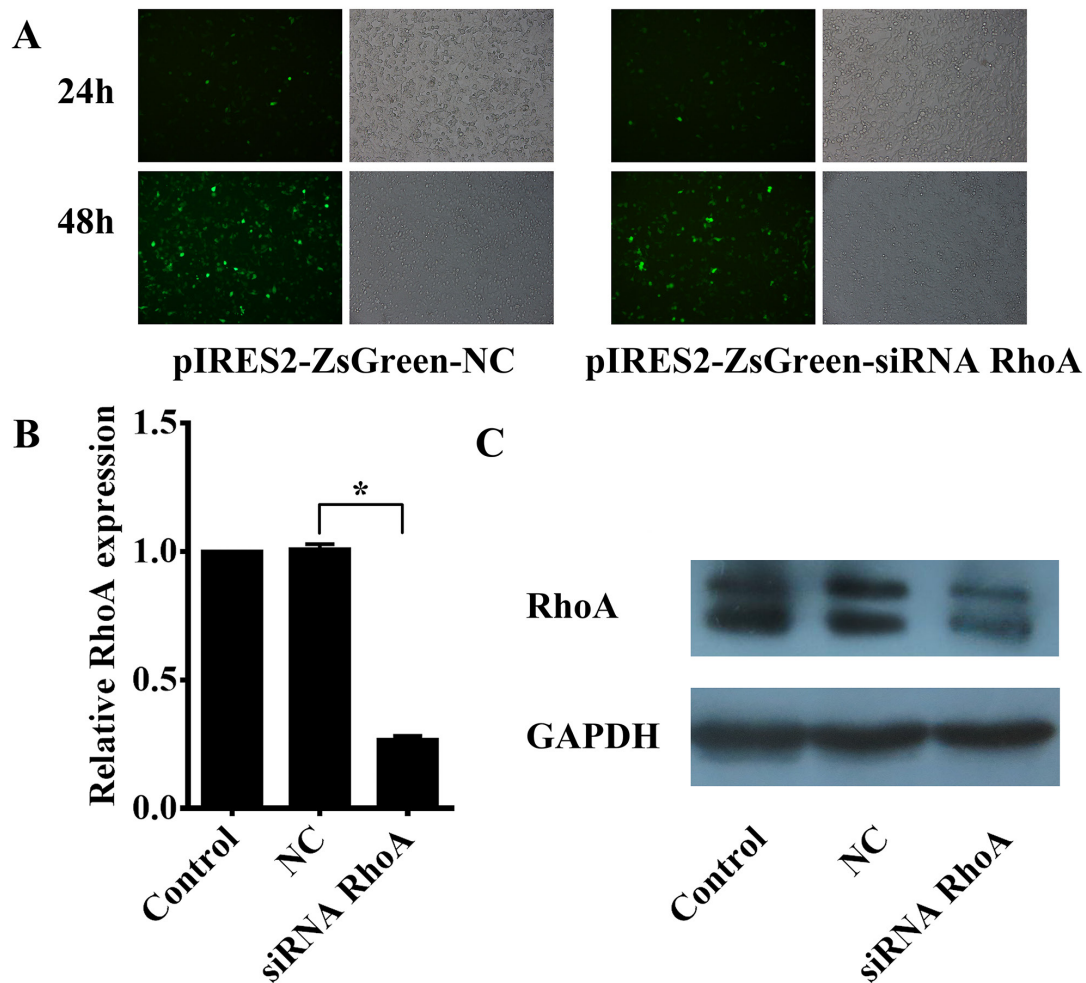

**Supplementary Figure S2: Silencing of RhoA by siRNA.** **A.** transfected with pIRES2-Zs-Green-NC (NC group) or pIRES2-Zs-Green-siRNA RhoA (siRNA RhoA group) for 24h and 48h exhibited green fluorescent signals under a fluorescence microscope and an inverted microscope, respectively. **B.** Expression of RhoA was measured by quantitative RT-PCR in Control group, NC group and siRNA RhoA group 48h after transfection. \* $P < 0.05$ . **C.** Expression of RhoA was measured by Western blot in Control group, NC group and siRNA RhoA group 48h after transfection.

**Supplementary Table S1: Subcutaneous tumor characteristics**

| Group        | Tumor length | Tumor width | Tumor volume  | Tumor weight | P Value |
|--------------|--------------|-------------|---------------|--------------|---------|
| HCT-116      | 12.97±2.68   | 9.87±2.11   | 711.25±425.67 | 0.21±0.02    |         |
| TAp63        | 10.00±1.45   | 8.36±1.19   | 379.85±163.74 | 0.18±0.01    | <0.05   |
| miR-133b     | 10.08±1.07   | 7.23±1.93   | 260.32±184.96 | 0.14±0.01    | <0.05   |
| TAp63+sponge | 12.80±1.48   | 10.80±1.10  | 791.34±225.35 | 0.27±0.02    | <0.05   |

Data are presented as mean (SD), except where indicated. The level of statistical significance was set at  $P < 0.05$ .
